# Supplementary material
Source: Research Square preprint supplement (doi:10.21203/rs.3.rs-8989201/v1)
Supplement: Supplementary file 1 [file 0d16137d0f10689e8d40e1cf.docx]

#### Table 2. The finalized BELIEF-V with 33 items across 11 theoretical constructs

| **Item** | **Theory** | **Code** |
| --- | --- | --- |
| 1. Tôi có nguy cơ cao mắc VGB. | Perceived susceptibility (HBM) | KNMB1 |
| 2. Tôi nghĩ rằng tôi sẽ bị nhiễm VGB trong tương lai. | KNMB2 |
| 3. Tôi có thể không còn khỏe mạnh nếu tôi bị nhiễm VGB. | Perceived severity/seriousness (HBM) | NT1 |
| 4.Tôi cảm thấy lo lắng khi nghĩ rằng tôi bị nhiễm VGB. | NT2 |
| 5. Chủng ngừa VGB (tiêm vắc xin và có đủ kháng thể) sẽ giúp tôi không bị nhiễm VGB | Perceived benefits (HBM) | LI1 |
| 6. Bằng việc chủng ngừa và không nhiễm VGB, tôi đang và sẽ bảo vệ những người khác không bị nhiễm VGB. | LI2 |
| 7.  Tôi cần tiêm vắc xin VGB đúng lịch để tôi không nhiễm HBV. | LI3 |
| 8. Vắc xin ngừa VGB có thể gây ra các tác dụng phụ sau tiêm. | Barriers (HBM) | RC1 |
| 9. Mũi tiêm VGB có thể gây đau. | RC2 |
| 10. Thời điểm để tôi đi tiêm vắc xin không thuận tiện | RC3 |
| 11. Địa điểm để tôi đi tiêm vắc xin không thuận tiện | RC4 |
| 12. Tôi nghĩ rằng, tất cả mọi người nên được tiêm ngừa VGB để nâng cao sức khỏe cộng đồng. | Cue to actions (HBM) | TD1 |
| 13. Tôi sẽ đồng ý tiêm ngừa VGB nếu nhân viên y tế đề nghị tiêm vắc xin này. | TD2 |
| 14. Đối với tôi, việc tiêm ngừa viêm gan B là dễ dàng | Self-efficacy (HBM) | TH1 |
| 15. Nếu tôi muốn, tôi có thể dễ dàng tiêm vắc xin ngừa VGB. | TH2 |
| 16. Tôi tin rằng, VGB là một tình trạng nghiêm trọng. | Threat appraisal_Severity (PMT) | DD1 |
| 17. Tôi tin rằng, VGB có ảnh hưởng xấu lên sức khỏe. | DD2 |
| 18. Tôi tin rằng, VGB là mối đe dọa nghiêm trọng đến sức khỏe. | DD3 |
| 19. Tôi tin rằng VGB là bệnh lý đáng quan tâm. | DD4 |
| 20. Tôi tin rằng, viêm gan B có thể gây nên bệnh lý nghiêm trọng, thậm chí tử vong. | DD5 |
| 21. Tôi nghĩ rằng, tôi có khả năng phơi nhiễm với VGB trong những năm tới. | Threat appraisal_Vulnerability (PMT) | MB1 |
| 22.  Trong một năm qua, đôi lúc tôi lo lắng về việc tiếp xúc với VGB. | MB2 |
| 23. Khả năng bị nhiễm VGB của tôi cao hơn so với người khác. | MB3 |
| 24.  Tiêm ngừa VGB là phương pháp hiệu quả bảo vệ tôi khỏi VGB. | Coping appraisal_Response efficacy (PMT) | HQ1 |
| 25.  Tiêm ngừa VGB là việc quan trọng. | HQ2 |
| 26.  Tiêm vắc xin ngừa VGB làm giảm phần lớn nguy cơ nhiễm VGB. | HQ3 |
| 27.  Tiêm vắc xin ngừa VGB đóng vai trò quan trọng trong việc bảo vệ bản thân tôi và người khác | HQ4 |
| 28.  Vắc xin VGB đóng góp quan trọng vào sự khỏe mạnh của tôi. | HQ5 |
| 29.  Tiêm ngừa VGB có ảnh hưởng tích cực lên sức khỏe của tôi. | HQ6 |
| 30. Tôi có thể tự quyết định việc tiêm ngừa VGB của bản thân. | Coping appraisal_Self-efficacy (PMT) | NTBT1 |
| 31.  Sự an toàn và các tác dụng phụ của vắc-xin VGB ảnh hưởng lên quyết định tiêm ngừa của tôi. | Coping appraisal _Response cost (PMT) | TT1 |
| 32.  Giá thành của vắc xin VGB ảnh hưởng lên quyết định tiêm ngừa của tôi. | TT2 |
| 33.  Thời gian dành cho việc tiêm ngừa ảnh hưởng lên quyết định tiêm ngừa của tôi. | TT3 |
