# Supplementary material
Source: Research Square preprint supplement (doi:10.21203/rs.3.rs-8989201/v1)
Supplement: Supplementary file 2 [file 4623013fda1a31f3e4047cbb.docx]

Table 6. Results of the first EFA analysis

| Observed variables | Factors | | | | | | | |
| --- | --- | --- | --- | --- | --- | --- | --- | --- |
| 1 | 2 | 3 | 4 | 5 | 6 | 7 | 8 |
| HQ5 | .882 |  |  |  |  |  |  |  |
| HQ4 | .880 |  |  |  |  |  |  |  |
| HQ3 | .858 |  |  |  |  |  |  |  |
| HQ6 | .837 |  |  |  |  |  |  |  |
| HQ2 | .759 |  |  |  |  |  |  |  |
| HQ1 | .670 |  |  |  |  |  |  |  |
| NTBT1 | .601 |  |  |  |  |  |  |  |
| DD3 |  | .926 |  |  |  |  |  |  |
| DD2 |  | .866 |  |  |  |  |  |  |
| DD1 |  | .822 |  |  |  |  |  |  |
| DD5 |  | .781 |  |  |  |  |  |  |
| DD4 |  | .775 |  |  |  |  |  |  |
| KNMB1 |  |  | .820 |  |  |  |  |  |
| MB3 |  |  | .818 |  |  |  |  |  |
| MB1 |  |  | .730 |  |  |  |  |  |
| KNMB2 |  |  | .695 |  |  |  |  |  |
| MB2 |  |  | .679 |  |  |  |  |  |
| NT2 |  |  |  |  |  |  |  |  |
| LI1 |  |  |  | .847 |  |  |  |  |
| LI3 |  |  |  | .744 |  |  |  |  |
| LI2 |  |  |  | .681 |  |  |  |  |
| NT1 |  |  |  |  |  |  |  |  |
| TH1 |  |  |  |  | .907 |  |  |  |
| TH2 |  |  |  |  | .877 |  |  |  |
| TD2 |  |  |  |  | .524 |  |  |  |
| TD1 |  |  |  |  |  |  |  |  |
| TT2 |  |  |  |  |  | .823 |  |  |
| TT3 |  |  |  |  |  | .798 |  |  |
| TT1 |  |  |  |  |  | .778 |  |  |
| RC3 |  |  |  |  |  |  | .906 |  |
| RC4 |  |  |  |  |  |  | .892 |  |
| RC2 |  |  |  |  |  |  |  | .876 |
| RC1 |  |  |  |  |  |  |  | .790 |
