# Supplementary material
Source: Research Square preprint supplement (doi:10.21203/rs.3.rs-8989201/v1)
Supplement: Supplementary file 3 [file 5adc4ef74b496cbd698720fb.docx]

# Table 5. Construct validity: convergent and discriminant validity

|  | CR | AVE | MSV | MaxR(H) | 1 | 2 | 3 | 4 | 5 | 6 | 7 | 8 |
| --- | --- | --- | --- | --- | --- | --- | --- | --- | --- | --- | --- | --- |
| 1 | 0.932 | 0.665 | 0.581 | 0.946 | 0.815 |  |  |  |  |  |  |  |
| 2 | 0.922 | 0.704 | 0.581 | 0.932 | 0.762*** | 0.839 |  |  |  |  |  |  |
| 3 | 0.818 | 0.478 | 0.113 | 0.835 | 0.326*** | 0.306*** | 0.691 |  |  |  |  |  |
| 4 | 0.801 | 0.577 | 0.242 | 0.829 | 0.144*** | 0.151*** | 0.331*** | 0.759 |  |  |  |  |
| 5 | 0.729 | 0.475 | 0.444 | 0.741 | 0.666*** | 0.579*** | 0.211*** | 0.181*** | 0.689 |  |  |  |
| 6 | 0.776 | 0.549 | 0.361 | 0.838 | 0.601*** | 0.553*** | 0.291*** | 0.009 | 0.487*** | 0.741 |  |  |
| 7 | 0.831 | 0.711 | 0.242 | 0.835 | -0.122*** | -0.055† | 0.156*** | 0.492*** | 0.029 | -0.167*** | 0.843 |  |
| 8 | 0.599 | 0.429 | 0.134 | 0.611 | 0.261*** | 0.278*** | 0.336*** | 0.366*** | 0.344*** | 0.158*** | 0.361*** | 0.655 |
