# Supplementary material
Source: Research Square preprint supplement (doi:10.21203/rs.3.rs-8989201/v1)
Supplement: Supplementary file 4 [file 766d19f51ff41d23de274014.docx]

#### Table 7. Results of second EFA analysis

| Observed variables | Factors | | | | | | | |
| --- | --- | --- | --- | --- | --- | --- | --- | --- |
| 1 | 2 | 3 | 4 | 5 | 6 | 7 | 8 |
| HQ5 | .908 |  |  |  |  |  |  |  |
| HQ4 | .899 |  |  |  |  |  |  |  |
| HQ3 | .875 |  |  |  |  |  |  |  |
| HQ6 | .867 |  |  |  |  |  |  |  |
| HQ2 | .772 |  |  |  |  |  |  |  |
| HQ1 | .641 |  |  |  |  |  |  |  |
| NTBT1 | .634 |  |  |  |  |  |  |  |
| DD3 |  | .931 |  |  |  |  |  |  |
| DD2 |  | .876 |  |  |  |  |  |  |
| DD1 |  | .837 |  |  |  |  |  |  |
| DD5 |  | .799 |  |  |  |  |  |  |
| DD4 |  | .767 |  |  |  |  |  |  |
| KNMB1 |  |  | .836 |  |  |  |  |  |
| MB3 |  |  | .815 |  |  |  |  |  |
| MB1 |  |  | .748 |  |  |  |  |  |
| KNMB2 |  |  | .700 |  |  |  |  |  |
| MB2 |  |  | .684 |  |  |  |  |  |
| TT2 |  |  |  | .846 |  |  |  |  |
| TT3 |  |  |  | .811 |  |  |  |  |
| TT1 |  |  |  | .804 |  |  |  |  |
| LI1 |  |  |  |  | .869 |  |  |  |
| LI3 |  |  |  |  | .767 |  |  |  |
| LI2 |  |  |  |  | .697 |  |  |  |
| TH1 |  |  |  |  |  | .916 |  |  |
| TH2 |  |  |  |  |  | .903 |  |  |
| TD2 |  |  |  |  |  | .474 |  |  |
| RC3 |  |  |  |  |  |  | .901 |  |
| RC4 |  |  |  |  |  |  | .886 |  |
| RC2 |  |  |  |  |  |  |  | .877 |
| RC1 |  |  |  |  |  |  |  | .789 |
