# Supplementary material
Source: Research Square preprint supplement (doi:10.21203/rs.3.rs-8989201/v1)
Supplement: Supplementary file 5 [file aede561f9e76c47c6771c295.docx]

Table 4. Summary of Cronbach’s alpha results

| Subscale | KNMB | NT | LI | RC | TD | TH | DD | MB | HQ | NTBT | TT |
| --- | --- | --- | --- | --- | --- | --- | --- | --- | --- | --- | --- |
| Number of items (n=33) | 2 | 2 | 3 | 4 | 2 | 2 | 5 | 3 | 6 | 1 | 3 |
| Cronbach’s alpha | 0.65 | 0.65 | 0.72 | 0.65 | 0.64 | 0.83 | 0.91 | 0.79 | 0.93 | - | 0.79 |
