# Supplementary material
Source: Research Square preprint supplement (doi:10.21203/rs.3.rs-8989201/v1)
Supplement: Supplementary file 6 [file e841d2ffed170c13319c3290.docx]

Table 1. Original items were selected from the literature review (BELIEF-E)

| 1. My child is at high risk for Hepatitis. 2. I think my child will get Hepatitis B in the future. 3. My child could be very sick if she/he got HBV. 4. I am afraid to even think about my child getting sick with HBV. 5. Immunization will prevent my child from catching HBV. 6. By being immunized and not getting HBV, my child will be protecting others from HBV. 7. Need to get the Hepatitis B vaccination on schedule to prevent my child from getting HBV. 8. The Hepatitis B vaccine can cause AEFIs (Adverse Events Following Immunization). 9. The Hepatitis B shot can be painful. 10. It is an inconvenient time to take my child in for vaccines. 11. That is an inconvenient location to take my child in for vaccines. 12. I think that all people should be vaccinated to promote public health. 13. I will receive a COVID-19 vaccine if my healthcare workers recommended a vaccination. 14. For me to have a COVID-19 vaccination, it would be easy. 15. If I wanted to I could easily have a COVID-19 vaccination. 16. I believe that COVID-19 is a serious problem. 17. I believe that COVID-19 has bad effects on health. 18. I believe that COVID-19 is a serious threat to my health. 19. I believe that COVID-19 is a significant disease. 20. I believe that COVID-19 can cause serious problems and even death. 21. How likely do you think it is that you will contract COVID-19 over the next 1 month? 22. In the past one week, have you ever worried about catching COVID-19? 23. What do you think are your chances of getting COVID-19 over the next 1 month compared to others outside your family? 24. Vaccination is a very effective way to protect me against COVID-19. 25. It is important that I get the COVID-19 jab. 26. Vaccination greatly reduces my risk of catching COVID-19. 27. The COVID-19 jab plays an important role in protecting my life and that of others. 28. The contribution of the COVID-19 jab to my health and well-being is very important. 29. Getting the COVID-19 jab has a positive influence on my health. 30. I can choose whether to get a COVID-19 jab or not. 31. Safety and possible side effects of COVID-19 vaccine. 32. Cost of COVID-19 vaccine. 33. Time spent on vaccination will influence my willingness to get COVID-19 vaccinated. |
| --- |
